# Supplementary material for: Patatin-related phospholipase pPLAIIIδ influences auxin-responsive cell morphology and organ size in Arabidopsis and Brassica napus
Source: PubMed Central journal article supplement (PMC4253999; doi:10.1186/s12870-014-0332-1), 2014-11-27
Supplement: 12870_2014_332_MOESM1_ESM.pdf [file 12870_2014_332_MOESM1_ESM.pdf]

## Supplemental Figure S1

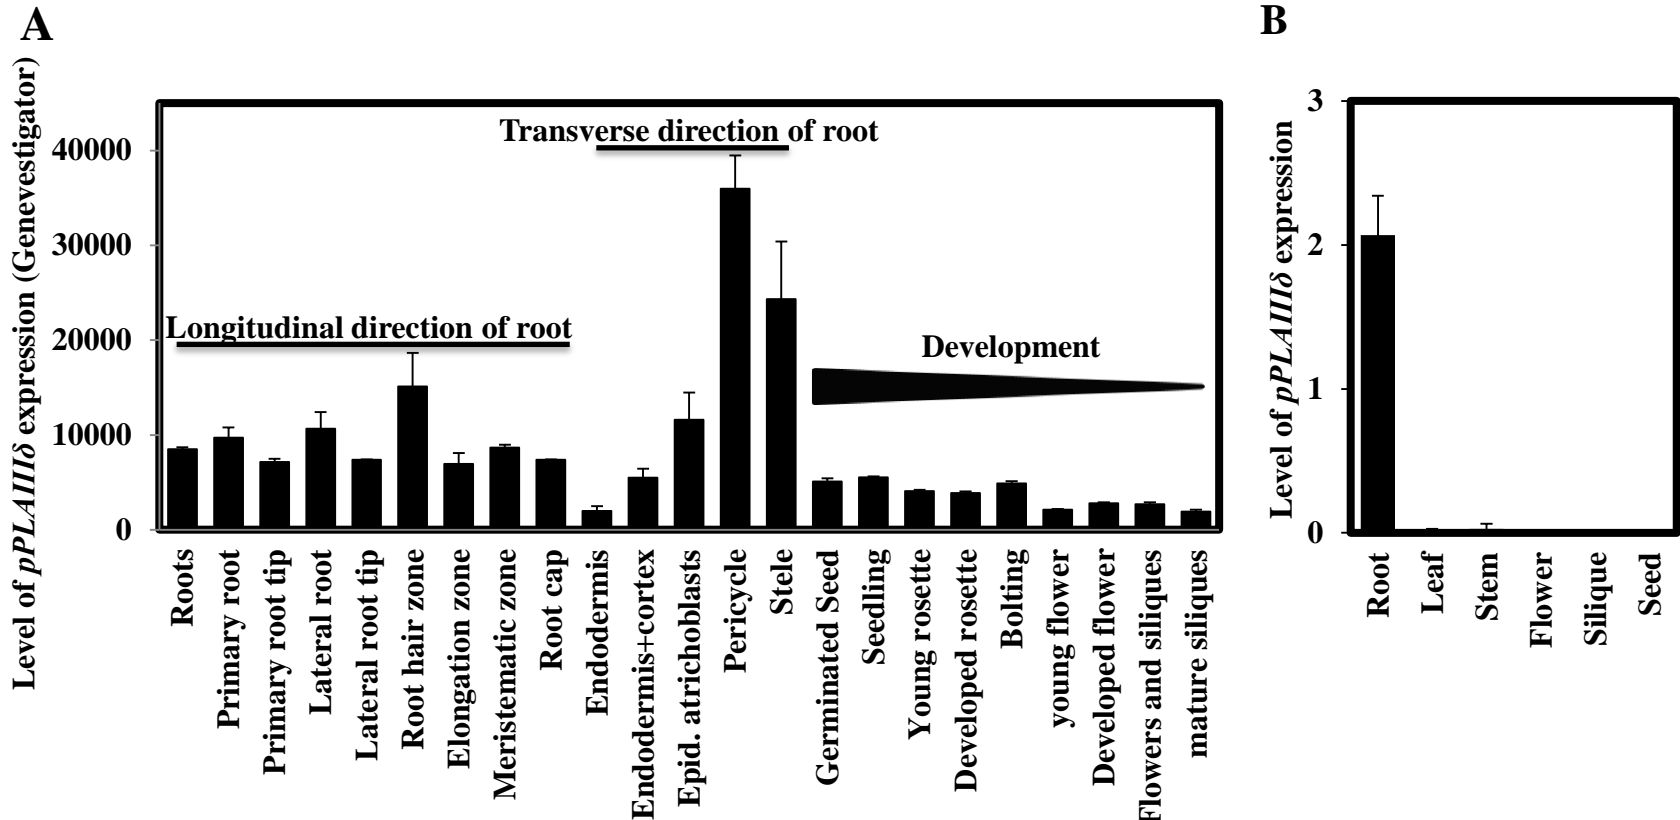

### Supplemental Figure S1. Expression pattern of *pPLAIIIδ*

(A) The temporal expression of *pPLAIIIδ* and the root expression pattern in longitudinal and transverse directions based on data from Genevestigator (<http://www.genevestigator.com>).

(B) The relative expression ratios of *pPLAIIIδ* in various *Arabidopsis* tissues quantified by real-time PCR normalized to *ACT7*. Values are means  $\pm$  SD (n=3 replicates).
