# Supplementary material for: Patatin-related phospholipase pPLAIIIδ influences auxin-responsive cell morphology and organ size in Arabidopsis and Brassica napus
Source: PubMed Central journal article supplement (PMC4253999; doi:10.1186/s12870-014-0332-1), 2014-11-27
Supplement: 12870_2014_332_MOESM2_ESM.pdf [file 12870_2014_332_MOESM2_ESM.pdf]

## Supplemental Figure S2

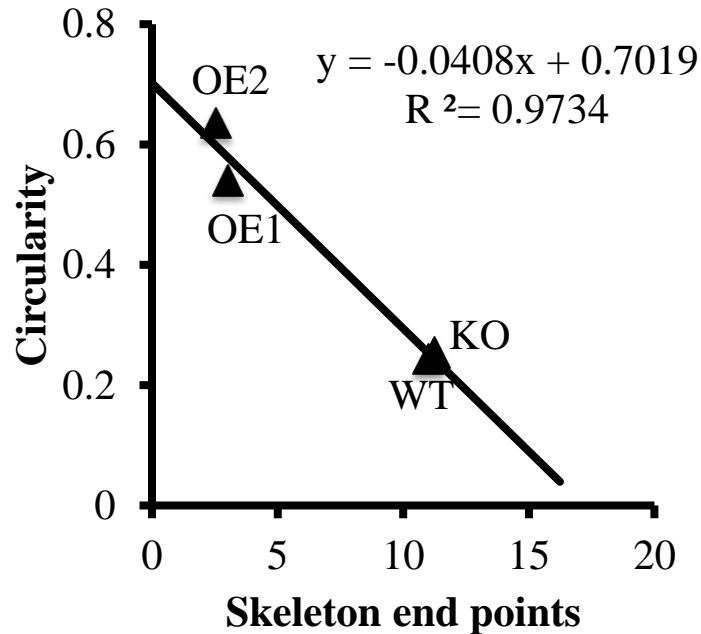

### Supplemental Figure S2. Linear Relations between Circularity and Skeleton End-Points of the Leaf Pavement Cell.

The circularity and skeleton end-points for pavement cell shape in WT, KO, OE1 and OE2 leaves exhibited an inverse linear relation.
