# Supplementary material for: Patatin-related phospholipase pPLAIIIδ influences auxin-responsive cell morphology and organ size in Arabidopsis and Brassica napus
Source: PubMed Central journal article supplement (PMC4253999; doi:10.1186/s12870-014-0332-1), 2014-11-27
Supplement: 12870_2014_332_MOESM3_ESM.pdf [file 12870_2014_332_MOESM3_ESM.pdf]

## Supplemental Figure S3.

**A Percentage of different element types**

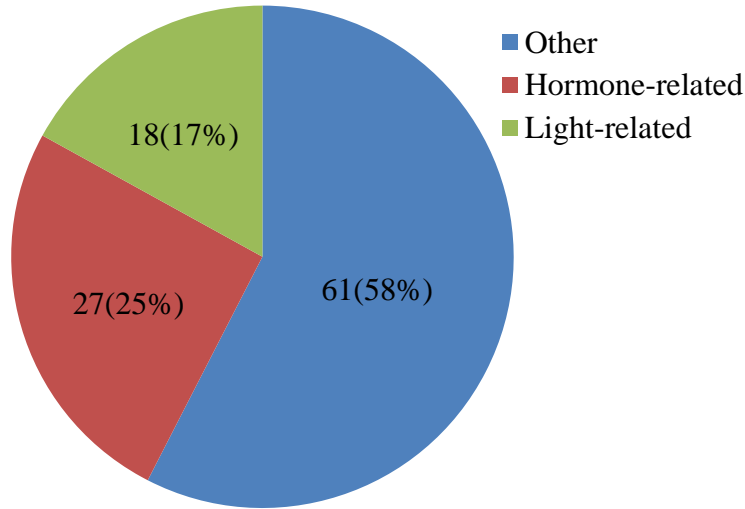

**B Percentage of different elements**

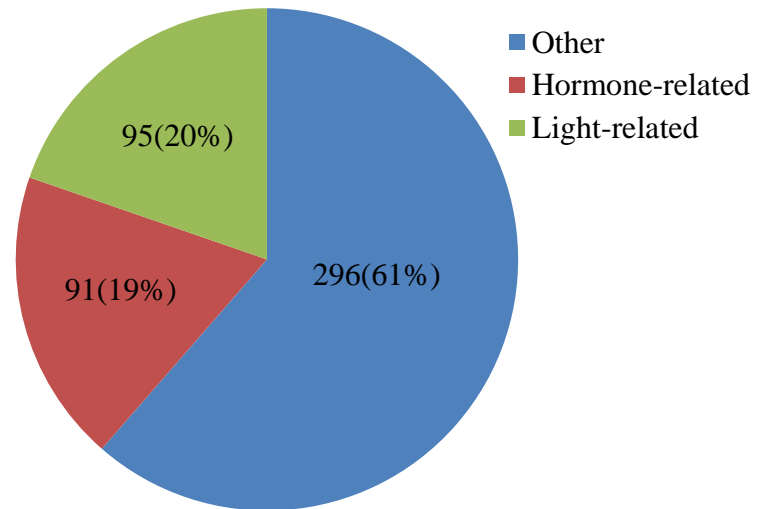

### Supplemental Figure S3. Bioinformatic analysis of promoter elements in *pPLAIII $\delta$* .

(A) Types of *pPLAIII $\delta$*  promoter elements related to various hormones. The hormone-related and light-related elements accounted for 25% and 17% of total elements, respectively.

(B) The promoter of *pPLAIII $\delta$*  included 19% hormone-response sites and 20% the light-response sites.
