# Supplementary material for: Patatin-related phospholipase pPLAIIIδ influences auxin-responsive cell morphology and organ size in Arabidopsis and Brassica napus
Source: PubMed Central journal article supplement (PMC4253999; doi:10.1186/s12870-014-0332-1), 2014-11-27
Supplement: 12870_2014_332_MOESM4_ESM.pdf [file 12870_2014_332_MOESM4_ESM.pdf]

**Table S1** Hormone-relative elements in the promoter of *pPLAIII $\delta$* 

| Site name             | Site(strand)      | Element                                  |
|-----------------------|-------------------|------------------------------------------|
| ABRERATCAL            | 646 (+) MACGYGB   | ABRE 2                                   |
| AGCBOXNPGLB           | 628 (+) AGCCGCC   | Ethylene-responsive element              |
| ABRELATERD1           | 647 (+) ACGTG     | ABRE 3                                   |
| ASF1MOTIFCAMV         | 1005 (+) TGACG    | Auxin and/or salicylic acid 4            |
| CPBCSPOR              | 1555(+)TATTAG     | Cytokinin-enhanced Protein Binding 2     |
| DPBFCOREDCDC3         | 1278(+)ACACNNG    | ABA-responsive 3                         |
| GAREAT                | 1036 (-) TAACAAR  | GA/GARE                                  |
| LECPLEACS2            | 1154 (+) TAAAATAT | Ethylene-responsive element              |
| MYBGAHV               | 1036 (-) TAACAAA  | GA                                       |
| MYCCONSENSUSAT        | 201 (+) CANNTG    | ABA 4                                    |
| PYRIMIDINEBOXHVEPB1   | 717 (+) TTTTTTCC  | GA/ABA/GARE 2                            |
| PYRIMIDINEBOXOSRAMY1A | 1061 (+) CCTTTT   | GA 3                                     |
| TATCCAOSAMY           | 473(+)TATCCA      | Gibberellin Response 2                   |
| WBOXATNPR1            | 348(+)TTGAC       | Salicylic acid (SA)-induced 9            |
| WRKY71OS              | 26 (+) TGAC       | GA 14                                    |
| SURECOREATSULTR11     | 81 (+) GAGAC      | ARF control cis 3                        |
| ARFAT                 | 282(-)TGTCTC      | ARF (auxin response factor) binding site |
| ARR1AT                | 543(+)NGATT       | Cytokinin-regulated transcription 28     |
| CACGCAATGMGH3         | 414(+)CACGCAAT    | Auxin inducibility                       |
| CACGTGMOTIF           | 1279(+)CACGTG     | Abscisic acid-induced transcription 2    |
| CAREOSREP1            | 47(-)CAACTC       | Gibberellin-upregulated                  |
| ELRECOREPCR1          | 1251(+)TTGACC     | Salicylic acid-induced                   |
| GCCCORE               | 629(+)GCCGCC      | Ethylene-responsive element              |
| MYB1AT                | 108(+)WAACCA      | Abscisic acid signaling 2                |
| MYB2CONSENSUSAT       | 352(+)YAACKG      | Abscisic acid signaling                  |
| MYBCORE               | 352(-)CNGTTR      | Flavonoid biosynthesis                   |
| MYBCOREATCYCB1        | 353(+)AACGG       | Cell cycle phase-independent activation  |
