# Supplementary material for: Patatin-related phospholipase pPLAIIIδ influences auxin-responsive cell morphology and organ size in Arabidopsis and Brassica napus
Source: PubMed Central journal article supplement (PMC4253999; doi:10.1186/s12870-014-0332-1), 2014-11-27
Supplement: 12870_2014_332_MOESM5_ESM.pdf [file 12870_2014_332_MOESM5_ESM.pdf]

## Supplemental Figure S4

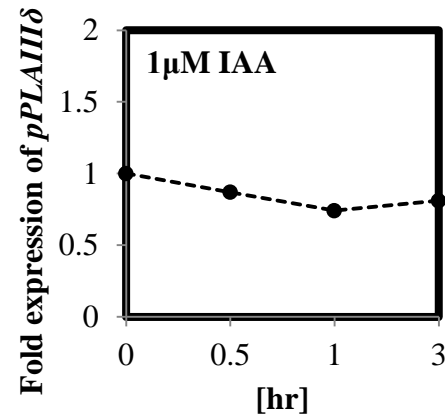

### Supplemental Figure S4. Time course of *pPLAIIIδ* expression responding to auxin treatment based on data from website.

(<http://jsp.weigelworld.org/expviz/expviz.jsp?experiment=development&normalization=absolute&probesetcsv=At3g63200&action=Run>).

Under 1 μM IAA treatment, the expression of *pPLAIIIδ* was only down-regulated slightly.
