# Supplementary material for: Patatin-related phospholipase pPLAIIIδ influences auxin-responsive cell morphology and organ size in Arabidopsis and Brassica napus
Source: PubMed Central journal article supplement (PMC4253999; doi:10.1186/s12870-014-0332-1), 2014-11-27
Supplement: 12870_2014_332_MOESM6_ESM.pdf [file 12870_2014_332_MOESM6_ESM.pdf]

## Supplemental Figure S5

A

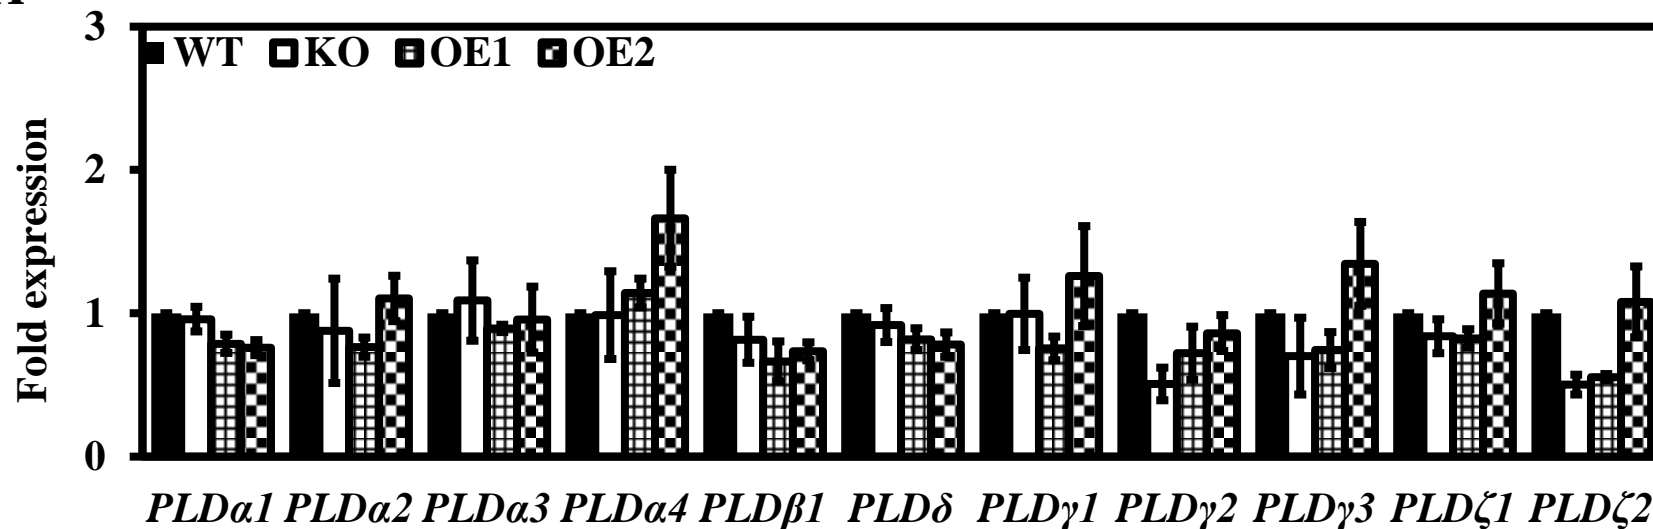

B

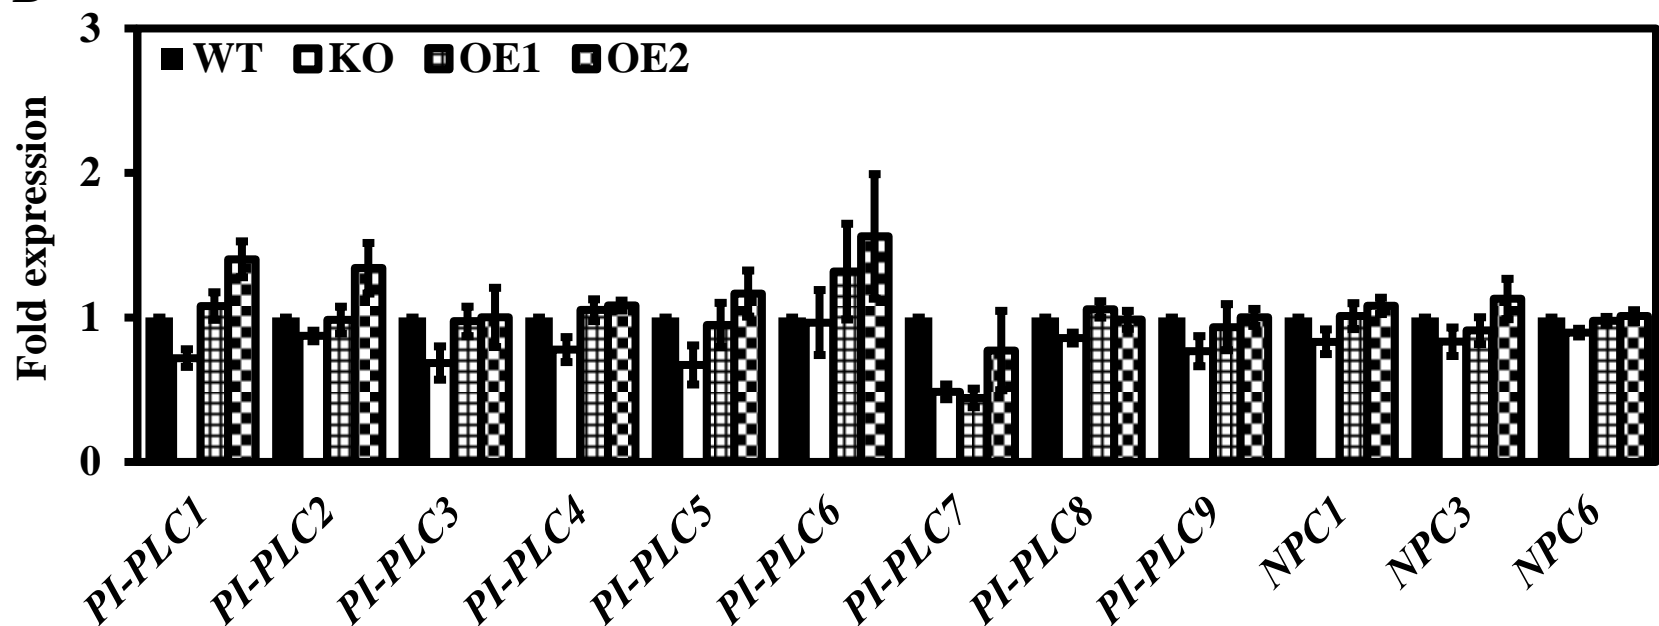

### Supplemental Figure S5. Expression of genes involved in PLD-and PLD-DGK-pathways

(A) The expression of *PLD* genes involved in PLD-dependent PA production. Except *PLDβ2*, 11 of 12 *PLD* genes could be detected in the young seedlings.

(B) The expression of *PLC* genes involved in PLC-DGK-dependent PA production. Real-time PCR data were normalized to *ACT7*. The data came from three biological treatments. Values are means  $\pm$  SD (n=3 technical replicates).
