# Supplementary material for: Patatin-related phospholipase pPLAIIIδ influences auxin-responsive cell morphology and organ size in Arabidopsis and Brassica napus
Source: PubMed Central journal article supplement (PMC4253999; doi:10.1186/s12870-014-0332-1), 2014-11-27
Supplement: 12870_2014_332_MOESM8_ESM.pdf [file 12870_2014_332_MOESM8_ESM.pdf]

**Table S2** Primers for mutant identify, molecular cloning and real-time PCR in quantitative measurement of transcript levels.

| Gene                              | AGI       | Description                                                                                                     | Primers                                           |
|-----------------------------------|-----------|-----------------------------------------------------------------------------------------------------------------|---------------------------------------------------|
| <i>pPLAIII<math>\delta</math></i> | AT3G63200 | Screening for T-DNA insertional mutant of Salk_029470C                                                          | Forward 5'-CAAGCAACAAATATTAGCTGCCCAAAC-3'         |
|                                   |           |                                                                                                                 | Reverse 5'-TCGCAGTGAGAGAGCCATTTCT-3'              |
|                                   |           |                                                                                                                 | T-DNA detective primer 5'-ATTTTGCCGATTTCCGGAAC-3' |
| <i>pPLAIII<math>\delta</math></i> | AT3G63200 | Cloning <i>pPLAIII<math>\delta</math></i> gene for overexpression lines                                         | Forward 5'-ATTTAATTAATGGAGATGGATCTCAGCAAGGTT-3'   |
|                                   |           |                                                                                                                 | Reverse 5'-ATGGCGCGCCAACGGCCGTCAGCGAGAGGGTTAA-3'  |
| <i>pPLAIII<math>\delta</math></i> | AT3G63200 | Cloning intact <i>pPLAIII<math>\delta</math></i> gene including native promoter region for complementation line | Forward 5'-AGGCGCGCCAACTATCTCGTGTGCG-3'           |
|                                   |           |                                                                                                                 | Reverse 5'-AGGCGCGCCACTCTGTGCTGGCTATC-3'          |
| <i>pPLAIII<math>\delta</math></i> | AT3G63200 | Cloning the promoter of <i>pPLAIII<math>\delta</math></i> for the expression pattern analysis                   | Forward 5'-GGGATTAATTAAGTGTGCGTGGGAGCAGTGGA-3'    |
|                                   |           |                                                                                                                 | Reverse 5'-AAACTCTAGAACGGCCGTCAGCGAGAG-3'         |
| <i>pPLAIII<math>\delta</math></i> | AT3G63200 | Patatin-like protein 9 (PLP9)                                                                                   | Forward 5'-TCAAGCCGTTTCAGTGTAGTG-3'               |
|                                   |           |                                                                                                                 | Reverse 5'-AGTCATCTACGCCGTTTACTG-3'               |
| <i>ACS4</i>                       | AT2G22810 | Encodes 1-aminocyclopropane-4-carboxylate synthase                                                              | Forward 5'-GGTTGGGAAGAGTACGAGAAG-3'               |
|                                   |           |                                                                                                                 | Reverse 5'-GCTGCGTCTGTGTTTTGTG-3'                 |
| <i>ACS5</i>                       | AT5G65800 | Encodes 1-aminocyclopropane-4-carboxylate synthase                                                              | Forward 5'-TCACGAATCCATCTAACCCAC-3'               |
|                                   |           |                                                                                                                 | Reverse 5'-CCCGAACATAGTGCCTGAATAG-3'              |
| <i>ACS11</i>                      | AT3G49700 | Encodes 1-aminocyclopropane-4-carboxylate synthase                                                              | Forward 5'-GGTTTGTCTGTTGGGTTGAC-3'                |
|                                   |           |                                                                                                                 | Reverse 5'-AATGACACGATGAGCCTGG-3'                 |
| <i>ACO2</i>                       | AT1G62380 | Encodes 1-aminocyclopropane-1-carboxylic oxidase                                                                | Forward 5'-CGGGAAGTATAAGAGTGTGCTG-3'              |
|                                   |           |                                                                                                                 | Reverse 5'-GGTACTCGGAATCTTCTCG-3'                 |
| <i>ACO4</i>                       | AT1G05010 | Encodes 1-aminocyclopropane-1-carboxylic oxidase                                                                | Forward 5'-TTTCTACCTCAAGCACCTTCC-3'               |
|                                   |           |                                                                                                                 | Reverse 5'-CGGCGAAGTCTTTCATTAACG-3'               |
| <i>IAA2</i>                       | AT3G23030 | Early auxin-responsive gene                                                                                     | Forward 5'-CCAGTGAGATCTTCCCGTAAG-5'               |
|                                   |           |                                                                                                                 | Reverse 5'-CGATCTTGCGAAGGTAAGGAG-5'               |
| <i>IAA11</i>                      | AT4G28640 | Early auxin-responsive gene                                                                                     | Forward 5'-TGAGCTTGGTCTTACGTTGAG-6'               |
|                                   |           |                                                                                                                 | Reverse 5'-TCCTCTTGATCCCAGCAATTAC-6'              |
| <i>IAA13</i>                      | AT2G33310 | Early auxin-responsive gene                                                                                     | Forward 5'-AACTCGGTGAAAAGGCTACG-3'                |
|                                   |           |                                                                                                                 | Reverse 5'-CTCTCGTTTGGTTCTTGATTTGCG-3'            |

|                |           |                                                |                                       |
|----------------|-----------|------------------------------------------------|---------------------------------------|
| <i>SAUR9</i>   | AT4G36110 | Early auxin-responsive gene                    | Forward 5'-GAGGTGCTCAAGTCTAGGAAAG-3'  |
|                |           |                                                | Reverse 5'-CACGAGATTGGGACCACATAG-3'   |
| <i>SURA15</i>  | AT4G38850 | Early auxin-responsive gene                    | Forward 5'-AGGAGTTTCTTGGGTGCTAAG-5'   |
|                |           |                                                | Reverse 5'-CATAGACCGCCATGAATCCTC-5    |
| <i>SURA23</i>  | AT5G18060 | Early auxin-responsive gene                    | Forward 5'-TTTCTTGCAAGTGTACGTAGGAG-3' |
|                |           |                                                | Reverse 5'-ATCGTTAAGCCACCCATCG-3      |
| <i>SURA27</i>  | AT3G03840 | Early auxin-responsive gene                    | Forward 5'-AACGAGCAAAGCACCAAAAG-5'    |
|                |           |                                                | Reverse 5'-CGAGAAGTTACAGTGAGGAAGG-4   |
| <i>SURA28</i>  | AT3G03830 | Early auxin-responsive gene                    | Forward 5'-AACGAGCAAAGCACCAAAAG-4'    |
|                |           |                                                | Reverse 5'-AGAAGGGCCTGAAATGAAGG-4     |
| <i>GH3.5</i>   | AT4G27260 | Early auxin-responsive gene                    | Forward 5'-CTCGAAAACGGCAAAGGAATG-7'   |
|                |           |                                                | Reverse 5'-GTTGGTGTAAGGATCATAGGGTC-7  |
| <i>PIN1</i>    | AT1G73590 | PIN-FORMED 1                                   | Forward 5'-TCCATGTTGCCATTATCCAGG-6'   |
|                |           |                                                | Reverse 5'-ACATCCCAAATATCACCGCAG-6    |
| <i>PIN2</i>    | AT5G57090 | PIN-FORMED 2                                   | Forward 5'-CCGTAAGGTTCTTGACTGGAC-7'   |
|                |           |                                                | Reverse 5'-TGGCGAAAACAAAAGGAACG-7     |
| <i>PIN3</i>    | AT1G70940 | PIN-FORMED 3                                   | Forward 5'-TGGTGATTACTGCGTGTCG-5'     |
|                |           |                                                | Reverse 5'-GTACTCCTTCGCAACACAAAG-5    |
| <i>PIN4</i>    | AT2G01420 | PIN-FORMED 4                                   | Forward 5'-AACCCAAACACGTACTCCAG-3'    |
|                |           |                                                | Reverse 5'-ACATAGCCATTCCAAGACCAG-3    |
| <i>PIN5</i>    | AT5G16530 | PIN-FORMED 5                                   | Forward 5'-CAAGGTAATCGAAGCAATGGTTC-3' |
|                |           |                                                | Reverse 5'-ACTCAATGGTGAAGAGCGG-3      |
| <i>PIN6</i>    | AT1G77110 | PIN-FORMED 6                                   | Forward 5'-GCCTCATACTAACAGTCGTGG-3'   |
|                |           |                                                | Reverse 5'-GTGACCAGACAAGACCTAAGAG-3   |
| <i>PIN7</i>    | AT1G23080 | PIN-FORMED 7                                   | Forward 5'-ATTACGTGGAGACCTATTGCG-4'   |
|                |           |                                                | Reverse 5'-TGTACTCAAGATTGCGGGATG-4    |
| <i>PI-PLC1</i> | AT5G58670 | Phosphatidylinositol-specific phospholipase C1 | Forward 5'-GGTGGATGTGGCTATGTGAA-3'    |
|                |           |                                                | Reverse 5'-GTCCATATTCCATCCTTCTCCAG-3  |
| <i>PI-PLC2</i> | AT3G08510 | Phosphatidylinositol-specific phospholipase C2 | Forward 5'-TGACCAATATTCACCGCCTG-3'    |

|                                |           |                                                |                                        |
|--------------------------------|-----------|------------------------------------------------|----------------------------------------|
|                                |           |                                                | Reverse 5'-ACTCAAACACCTCATCCCAAG-3     |
| <i>PI-PLC3</i>                 | AT4G38530 | Phosphatidylinositol-specific phospholipase C3 | Forward 5'-GAGTGAAGTCCAAGGAGAACG-3'    |
|                                |           |                                                | Reverse 5'-GAGAGTTGGTATCGCTGAAGAG-3    |
| <i>PI-PLC4</i>                 | AT5G58700 | Phosphatidylinositol-specific phospholipase C4 | Forward 5'-TCTGCTCCGTGTTGAAGTTC-3'     |
|                                |           |                                                | Reverse 5'-TCCCTTGGCGATTAAGAGTGG-3     |
| <i>PI-PLC5</i>                 | AT5G58690 | Phosphatidylinositol-specific phospholipase C5 | Forward 5'-CACTTGGTCCTCTCCTAACTTC-3'   |
|                                |           |                                                | Reverse 5'-TCCGGTACTGTTAGCTGAAAC-3     |
| <i>PI-PLC6</i>                 | AT2G40116 | Phosphatidylinositol-specific phospholipase C6 | Forward 5'-GGGATATGGGAAATCTCTGTGG-3'   |
|                                |           |                                                | Reverse 5'-AGGGTCAAAGACTTCATCGTG-3     |
| <i>PI-PLC7</i>                 | AT3G55940 | Phosphatidylinositol-specific phospholipase C7 | Forward 5'-TGTATTTGACCCGGAAGCTAC-3'    |
|                                |           |                                                | Reverse 5'-GCAATCCCGACCCTTGTATAG-3     |
| <i>PI-PLC8</i>                 | AT3G47290 | Phosphatidylinositol-specific phospholipase C8 | Forward 5'-ATTAGTATTGCCGGTGTACCC-3'    |
|                                |           |                                                | Reverse 5'-CAAGGTCAGGATAGGTCAAAGG-3    |
| <i>PI-PLC9</i>                 | AT3G47220 | Phosphatidylinositol-specific phospholipase C9 | Forward 5'-TTAGGATCAGTATTGCCGGTG-3'    |
|                                |           |                                                | Reverse 5'-CAAGGTCAGGATAGGTCAAGG-3     |
| <i>NPC2</i>                    | AT3G03520 | Non-specific phospholipase C2                  | Forward 5'-AGGAGCTTAACCCAGAAATCG-3'    |
|                                |           |                                                | Reverse 5'-CGGGTCAGATGTAGAAAGTGG-3     |
| <i>NPC3</i>                    | AT1G07230 | Non-specific phospholipase C3                  | Forward 5'-GACCATCTCCTAACTCATATCCAG-3' |
|                                |           |                                                | Reverse 5'-AGTGTTTTTCGTCTGCTCCTG-3     |
| <i>NPC6</i>                    | AT3G48610 | Non-specific phospholipase C6                  | Forward 5'-AACAAGTATTCGGGTCTGGG-3'     |
|                                |           |                                                | Reverse 5'-AGCCTTTCATTACAGTCTCCG-3     |
| <i>PLD<math>\alpha</math>1</i> | AT3G15730 | Phospholipase D $\alpha$ 1                     | Forward 5'-CCCCTTCTCCTGTTATGTTCC-4'    |
|                                |           |                                                | Reverse 5'-TCTTTCCCACTTACAAGCCC-4      |
| <i>PLD<math>\alpha</math>2</i> | AT1G52570 | Phospholipase D $\alpha$ 2                     | Forward 5'-ACACTCCGTTTCACTCCTTG-8'     |
|                                |           |                                                | Reverse 5'-AGCAATAGGTCCTTCAAGACG-8     |
| <i>PLD<math>\alpha</math>3</i> | AT5G25370 | Phospholipase D $\alpha$ 3                     | Forward 5'-CTTTCACCAGCCGAAC TTTG-14'   |
|                                |           |                                                | Reverse 5'-ACCTTGTTTCATCCACCTCTG-14    |
| <i>PLD<math>\alpha</math>4</i> | AT1G55180 | Phospholipase D $\alpha$ 4                     | Forward 5'-GTGGGAGATTTACAGTGGAGAC-9'   |
|                                |           |                                                | Reverse 5'-ACACTAATTGGATAGGCGACC-9     |

|                       |           |                             |                                        |
|-----------------------|-----------|-----------------------------|----------------------------------------|
| <i>PLD</i> $\beta$ 1  | AT2G42010 | Phospholipase D $\beta$ 1   | Forward 5'-TGGAAAGCGACATAGTTGGG-5'     |
|                       |           |                             | Reverse 5'-ATCACATAGATCAAGCCCACC-5'    |
| <i>PLD</i> $\beta$ 2  | AT4G00240 | Phospholipase D $\beta$ 2   | Forward 5'-CGACCCAACCTCACAAAACATC-12'  |
|                       |           |                             | Reverse 5'-ACCCAACATATGTCGCTTTCC-12    |
| <i>PLD</i> $\gamma$ 1 | AT4G11850 | Phospholipase D $\gamma$ 1  | Forward 5'-ATAGACATGGAAAGTGCTGGG-15'   |
|                       |           |                             | Reverse 5'-CAACTCCCCTAATGTACCTTCG-15   |
| <i>PLD</i> $\gamma$ 2 | AT4G11830 | Phospholipase D $\gamma$ 2  | Forward 5'-AAGGTGCTATGTTGAGTCTGTC-6'   |
|                       |           |                             | Reverse 5'-CTCAAAGGGAAGTATGTACCGG-6    |
| <i>PLD</i> $\gamma$ 3 | AT4G11840 | Phospholipase D $\gamma$ 3  | Forward 5'-AAGGTGCTGTGTTGAGTCTG-13'    |
|                       |           |                             | Reverse 5'-CTTAAAGGGAAGTATGTACCGGG-13  |
| <i>PLD</i> $\delta$   | AT4G35790 | Phospholipase D $\delta$    | Forward 5'-AGGACGCTCATGTTATGGAC-7'     |
|                       |           |                             | Reverse 5'-TCTTCCCAACACTTCCCATG-7      |
| <i>PLD</i> $\zeta$ 1  | AT3G16785 | Phospholipase D $\zeta$ 1   | Forward 5'-TGCCGCTGTCAGATTATACG-11'    |
|                       |           |                             | Reverse 5'-AGAGAACGGTAAGCAGAATGG-11    |
| <i>PLD</i> $\zeta$ 2  | AT3G05630 | Phospholipase D $\zeta$ 2   | Forward 5'-ATCTCTGTTTTGGGCGGTAC-10'    |
|                       |           |                             | Reverse 5'-TCCTGTCTAACTCATCTTTCATCG-10 |
| <i>ACT7</i>           | AT5G09810 | Member of Actin gene family | Forward 5'-TGTTCACAGGAATTGCTGACCGTA-3' |
|                       |           |                             | Reverse 5'-TTGATCTTCATGCTGCTAGGTGCA-3  |
